# Supplementary material for: Induction of apoptosis and ferroptosis by a tumor suppressing magnetic field through ROS-mediated DNA damage
Source: Aging (Albany NY). 2020 Feb 18;12(4):3662–81. doi: 10.18632/aging.102836 (PMC7066880; doi:10.18632/aging.102836)
Supplement: Supplementary Figures [file aging-12-102836-s002..pdf]

SUPPLEMENTARY FIGURES

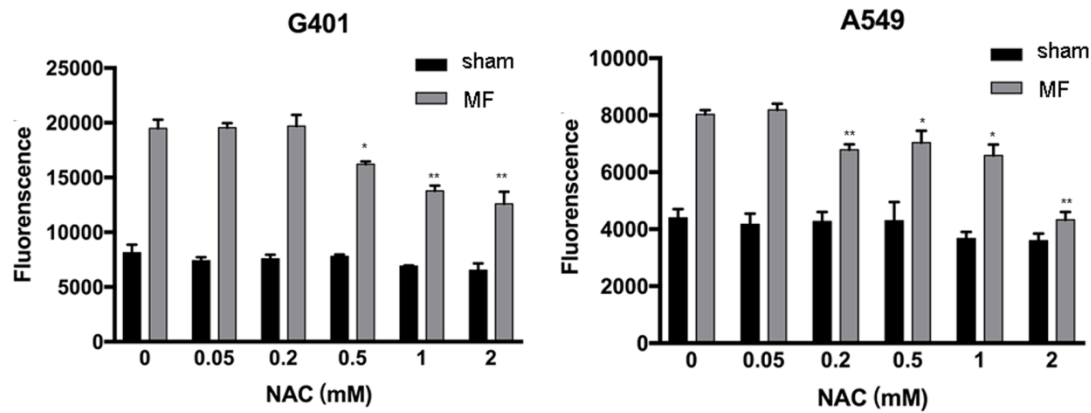

**Supplementary Figure 1. Decrease of intracellular ROS levels by NAC.** G401 and A549 cells were subjected to MF exposure for 0.5 h with or without 2 h<sup>+</sup> NAC pretreatment at the concentration of 0.05, 0.2, 0.5, 1, or 2 mM. ROS levels were measured by DCFH-DA probe after termination of exposure. Results are expressed as mean  $\pm$  SD (n=5). \*: P<0.05; \*\*: P<0.01, compared with MF group without NAC treatment.

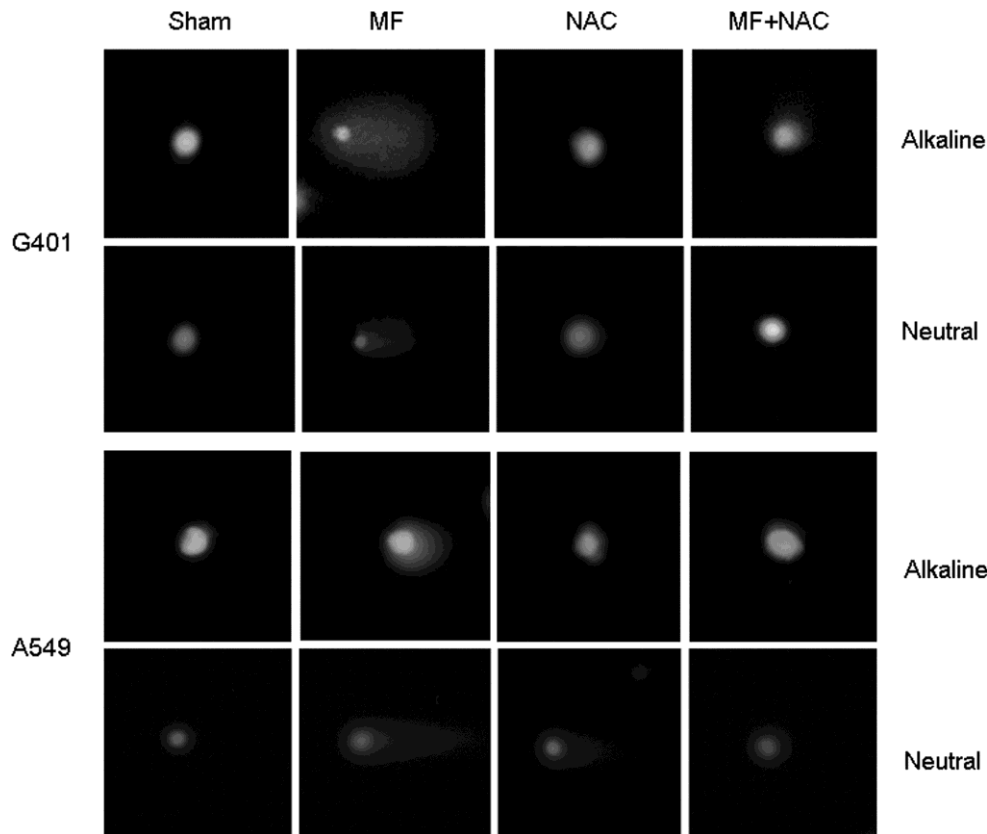

**Supplementary Figure 2. Imaging of DNA tails in the Comet assays.** G401 and A549 cells were subjected to MF exposure for 2 h daily for 3 consecutive days, with or without co-treatment of 1 mM NAC. Representative images of cell nuclei with or without tail DNA on exposure day 2 by alkaline and neutral Comet assays are shown. Statistics analysis is presented in Figure 5A, 5B.

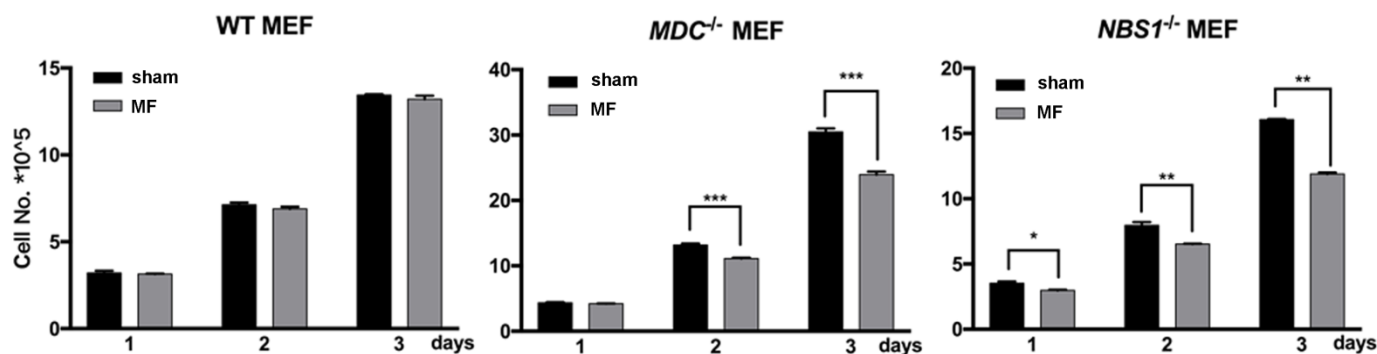

**Supplementary Figure 3. Growth curves of wild-type (WT) and DNA repair deficient MEF cells following MF exposure.** Wild-type (WT), *MDC*<sup>-/-</sup> and *NBS1*<sup>-/-</sup> MEF cells were subjected to MF exposure for 2 h daily for 3 consecutive days, or sham exposure. Number of viable cells was counted daily after treatments were terminated. Results are expressed as mean  $\pm$  SD (n=5). \*: P<0.05; \*\*: P<0.01; \*\*\*: P<0.001.

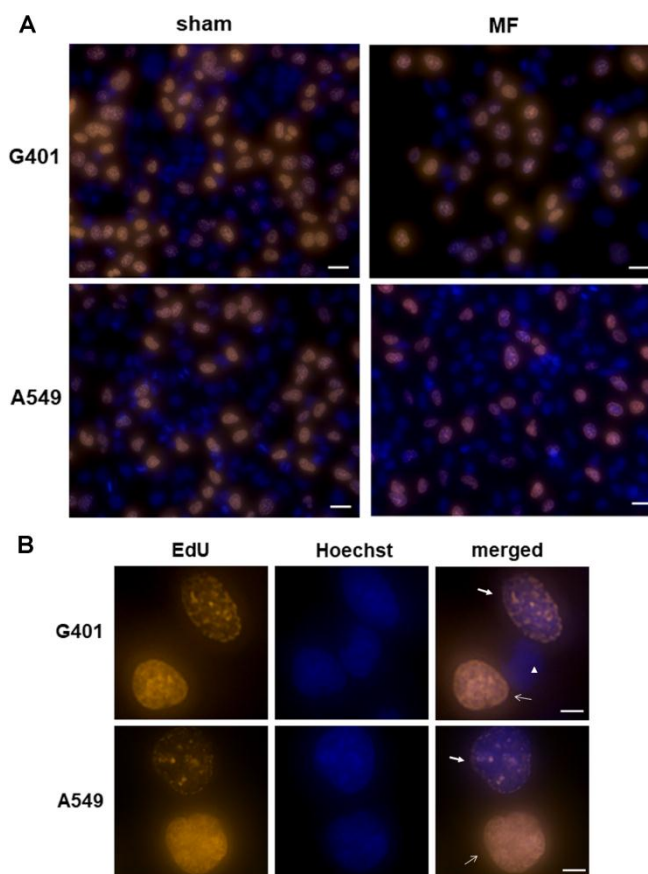

**Supplementary Figure 4. Visualization of EdU incorporation assay.** G401 and A549 cells were subjected to MF or sham exposure for 2 h daily for 3 consecutive days. (A) Representative overview of EdU and Hoechst 33342 fluorescence in G401 and A549 cells on exposure day 2. Scale bar= 20  $\mu$ m. (B) Representative images showing EdU positive nuclei (fine arrows) and partial incorporated nuclei (bold arrows). Triangle indicates nuclei without EdU incorporation. Scale bar= 5  $\mu$ m. Statistics analysis is presented in Figure 6A, 6B.

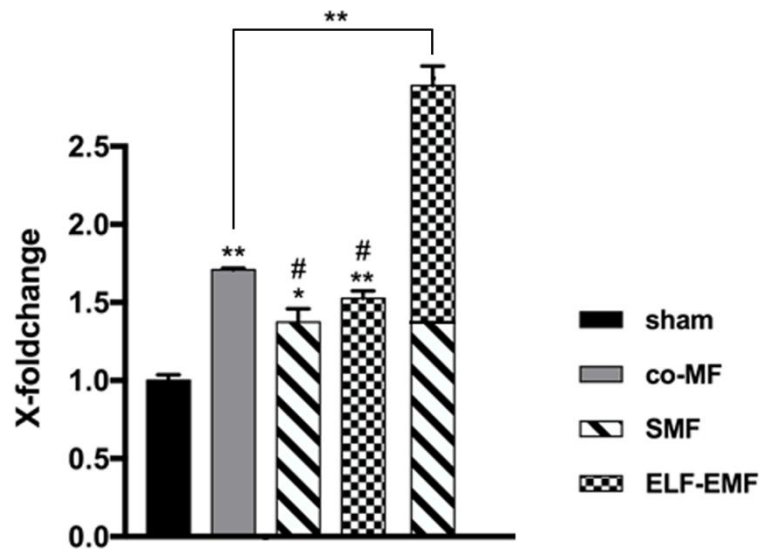

**Supplementary Figure 5. Change of intracellular ROS concentration under exposure of different types of fields.** G401 cells were exposed under modulated MF (Supplementary Table 1, co-MF), under SMF only, under ELF-EMF only, or with sham exposure. ROS was measured after exposure for 1.5 h. Y-axis indicates fold of change compared with the group with sham exposure. Data were shown as mean  $\pm$  SE from three independent experiments (n=5 in each experiment). \*: P<0.05, \*\*: P<0.01, compared with sham, or comparison of the groups indicated; #: P<0.05, ##: P<0.01, compared with co-MF.
