# Supplementary material for: Induction of apoptosis and ferroptosis by a tumor suppressing magnetic field through ROS-mediated DNA damage
Source: Aging (Albany NY). 2020 Feb 18;12(4):3662–81. doi: 10.18632/aging.102836 (PMC7066880; doi:10.18632/aging.102836)
Supplement: Supplementary Tables [file aging-12-102836-s001..pdf]

## SUPPLEMENTARY TABLES

**Supplementary Table 1. Magnetic field exposure protocol.**

|              | <b>T1</b> | <b>T2</b> | <b>T3</b> | <b>T4</b> | <b>T5</b> | <b>T6</b> | <b>T7</b> | <b>T8</b> |
|--------------|-----------|-----------|-----------|-----------|-----------|-----------|-----------|-----------|
| SMF (mT)     | 3         | 4         | 3         | 4         | 3         | 4         | 3         | 4         |
| ELF-EMF (mT) | 1.5       | 2.5       | 1.5       | 2.5       | 1         | 1.5       | 1         | 1.5       |

Extremely low frequency electromagnetic field (ELF-EMF) in 50 Hz are used in combination with static magnetic field (SMF). The field intensities vary periodically, and the time-averaged intensity is 5.1 mT. In a standard exposure protocol in vitro, one exposure is consisted of 4 consecutive sessions, each session composed of 8 rounds with the indicated intensities (T1-8). Each round lasts 3.5 min, making each session 30 min, and one exposure 2 h. Cells are subjected to exposure for 2 h per day for 3 consecutive days. As for in vivo study, the same 8 rounds of fields with varying intensities (T1-8) are exercised, but each round lasts 10 min, making each session a total of 80 min. Mice receive exposure 1 session per day for 15 consecutive days.

**Supplementary Table 2. Sequences of primers used in qRT-PCR.**

| <b>Gene</b>    | <b>Primer</b> | <b>Sequence</b>             |
|----------------|---------------|-----------------------------|
| <i>LIG4</i>    | Forward       | 5'-TCTCGTTTAACTGCGGCTTGC-3' |
|                | Reverse       | 5'-GGGATCTTGGCCTTCCACCC-3'  |
| <i>RAD9B</i>   | Forward       | 5'-GCCCAGCTCAGCCATCATTA-3'  |
|                | Reverse       | 5'-AACACAGAGGAAGTGCCAGG-3'  |
| <i>BMI1</i>    | Forward       | 5'-AAATCCCGGAAAGAGCAGCC-3'  |
|                | Reverse       | 5'-CTGGTTGCCCATGACAGCG-3'   |
| <i>β-ACTIN</i> | Forward       | 5'-GGACTTCGAGCAAGAGATGG-3'  |
|                | Reverse       | 5'-AGCACTGTGTTGGCGTACAG-3'  |
